# Supplementary material
Source: Springer Nature journal article supplement (https://www.springermedizin.de/resource/supplementary/12879_2011_2150_MOESM3_ESM.pdf/9443788)
Supplement: MOESM3 [file 9443788]

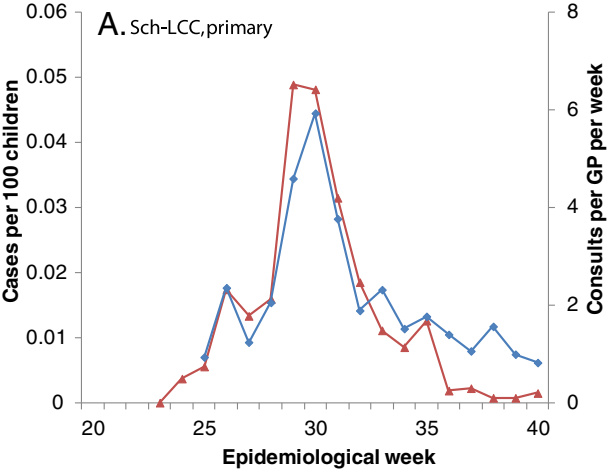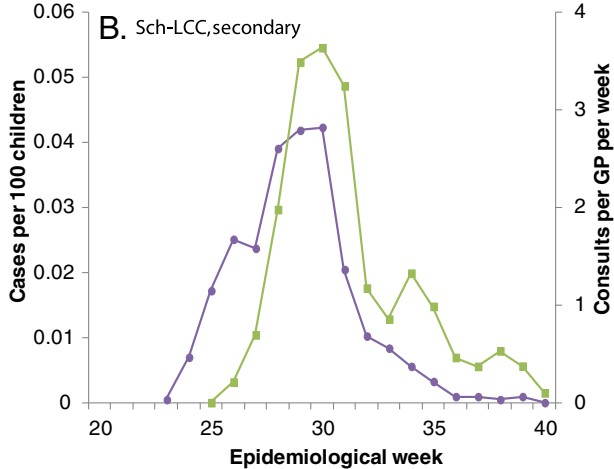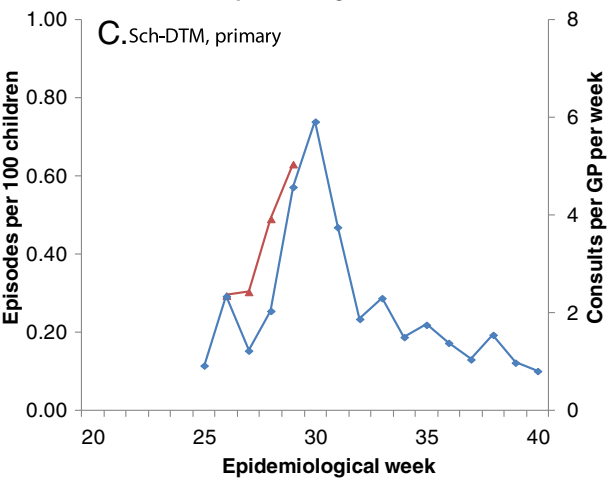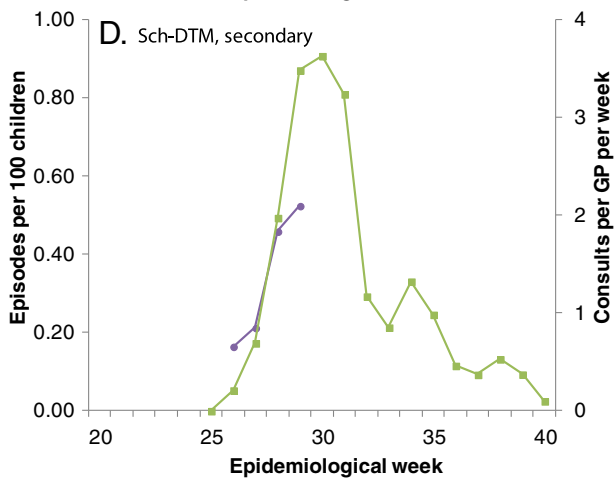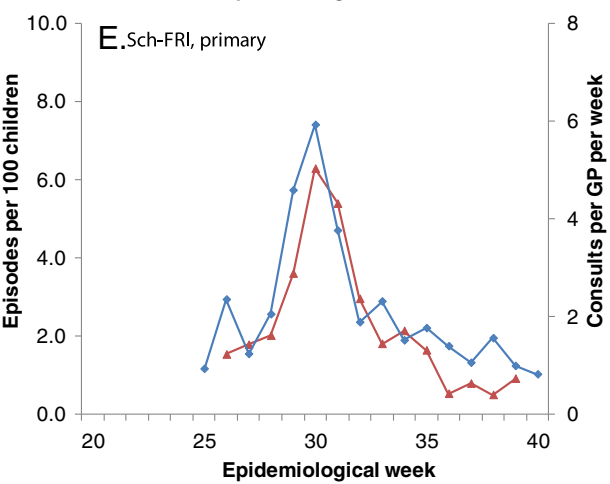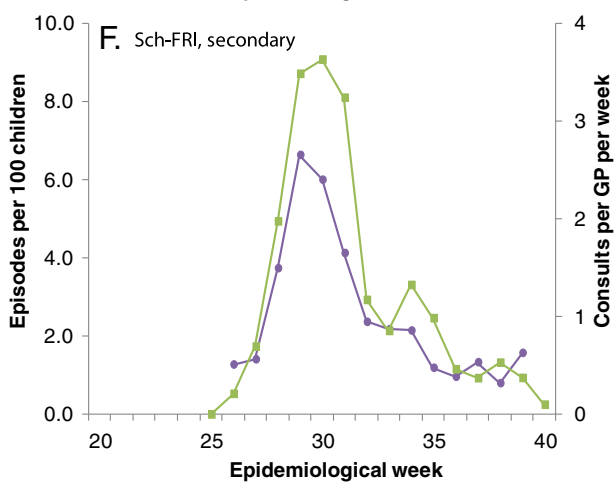

— School-based indicator, primary — GP-ILI, primary

— School-based indicator, secondary — GP-ILI, secondary
